# Supplementary material for: Domain-adaptive neural networks improve supervised machine learning based on simulated population genetic data
Source: PubMed Central journal article supplement — bioRxiv. 2023 Sep 6:2023.03.01.529396. Originally published 2023 Mar 1. Preprint. [Version 2] doi: 10.1101/2023.03.01.529396 (PMC10002701; doi:10.1101/2023.03.01.529396), 2023-09-06
Supplement: media-1.pdf [file media-1.pdf]

662 **Supplementary Figures**

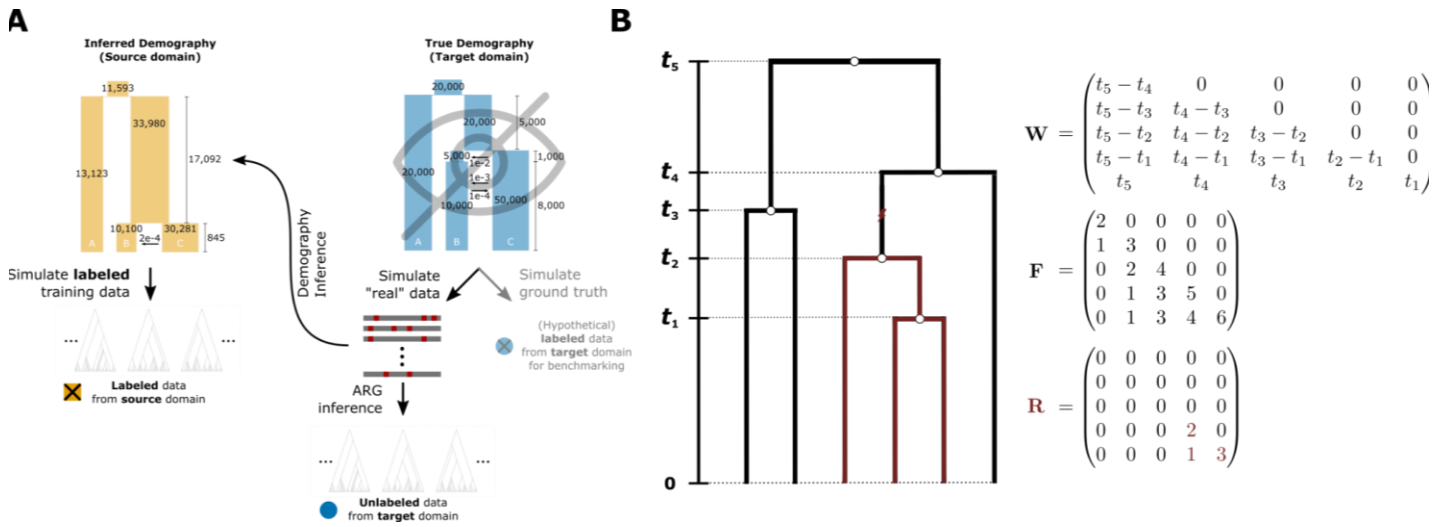

663 **Supplementary Figure 1. Domain-adaptive SIA. A)** The workflow of a simulation study  
 664 that aims to benchmark the performance of the domain-adaptive SIA model in a realistic  
 665 setting of demographic mis-specification. **B)** An improved version of SIA input features  
 666 that encodes the full genealogy (adapted from (Kim et al. 2020)). A genealogy with  $n$  taxa  
 667 at a polymorphic site is uniquely encoded by three  $(n-1) \times (n-1)$  lower triangular matrices.  
 668 The weight matrix  $W$  encodes the coalescent intervals where  $w_{ij} = t_{n-j} - t_{n-1-i}, \forall i \geq j$ ,  
 669 and the topology matrix  $F$  encodes the number of lineages persistent in the coalescent  
 670 intervals corresponding to  $W$  (i.e.  $f_{ij} = \#$  of lineages between  $t_{n-j}$  and  $t_{n-1-i}, \forall i \geq j$ ). The  
 671 derived lineage matrix  $R$  encodes only the subtree subtending the branch where the  
 672 mutation occurred (red lightning symbol), following the same scheme as  $F$ . Note that the  
 673  $W$  matrix is a redundant encoding of the  $n-1$  coalescent times  $(t_1, t_2, \dots, t_{n-1})$ , which contains  
 674 information roughly equivalent to the original SIA ARG features (Hejase et al. 2022).

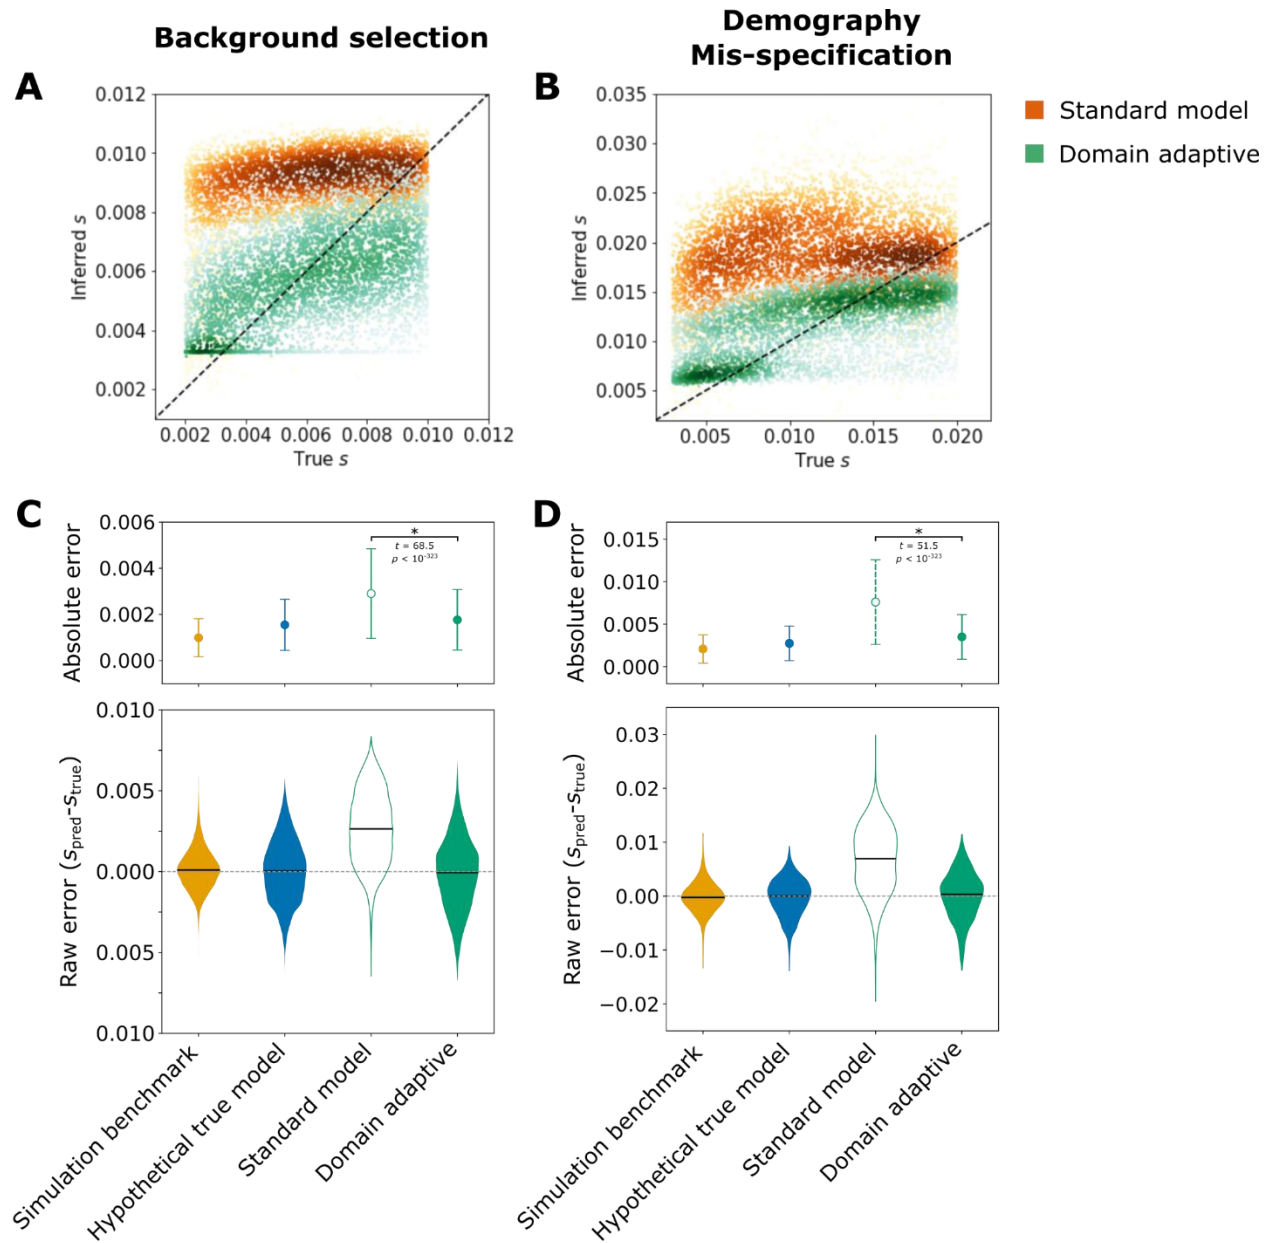

675 **Supplementary Figure 2. Selection coefficient inference performance of SIA**  
 676 **models.** Raw data used to plot **Figs. 3B** and **3D** are presented in **(A)** and **(B)**,  
 677 respectively. Performance of SIA models in the simulation experiment of failure to account  
 678 for background selection **(C)** and in the simulation experiment of demographic model mis-  
 679 specification **(D)** is presented in terms of mean and standard deviation of the absolute  
 680 error (top) as well as the distribution of raw error (bottom). Statistical significance (\*) of  
 681 the difference between the absolute error of the standard model and that of the domain-  
 682 adaptive model is evaluated with Welch's  $t$ -test. See **Fig. 1C** for definition of the model  
 683 labels.

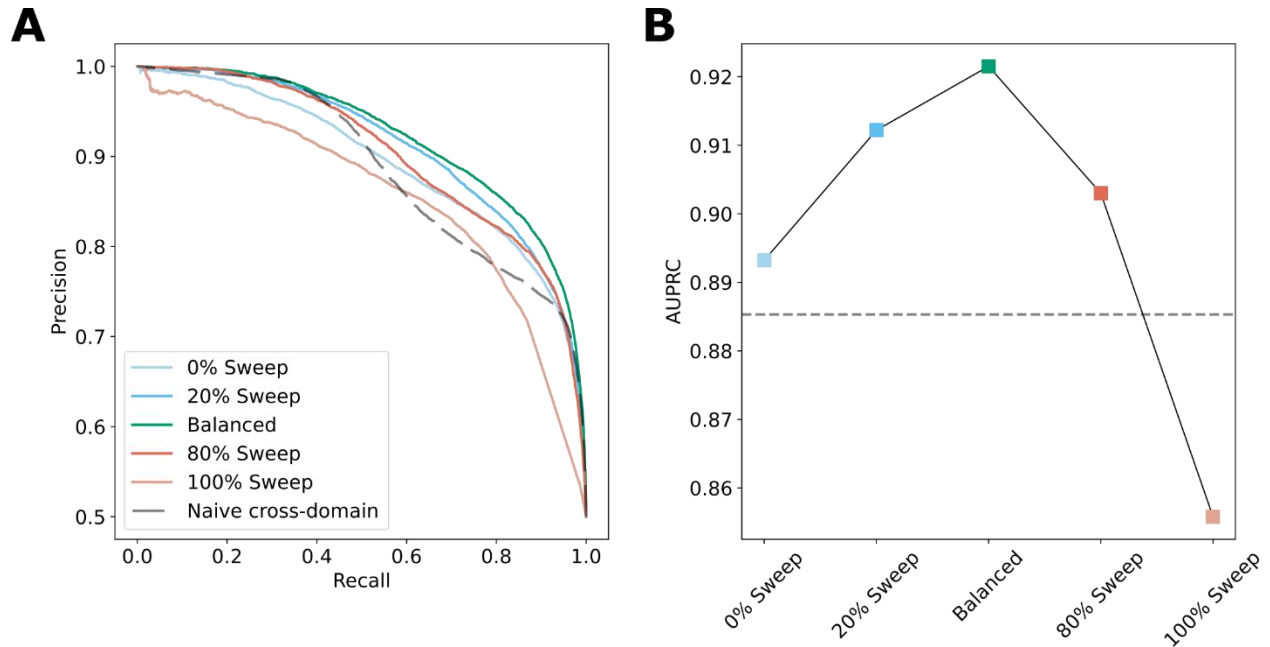

684 **Supplementary Figure 3. Sweep classification performance of domain-adaptive SIA**  
 685 **models trained with imbalanced target domain data.** The classification performance  
 686 of domain-adaptive SIA models trained with different proportions of sweep vs. neutral  
 687 examples in the target domain is shown in the form of precision-recall curves (**A**) and the  
 688 value of the area under precision-recall curve (AUPRC) (**B**). The dashed line in (**B**)  
 689 indicates AUPRC of the standard model.

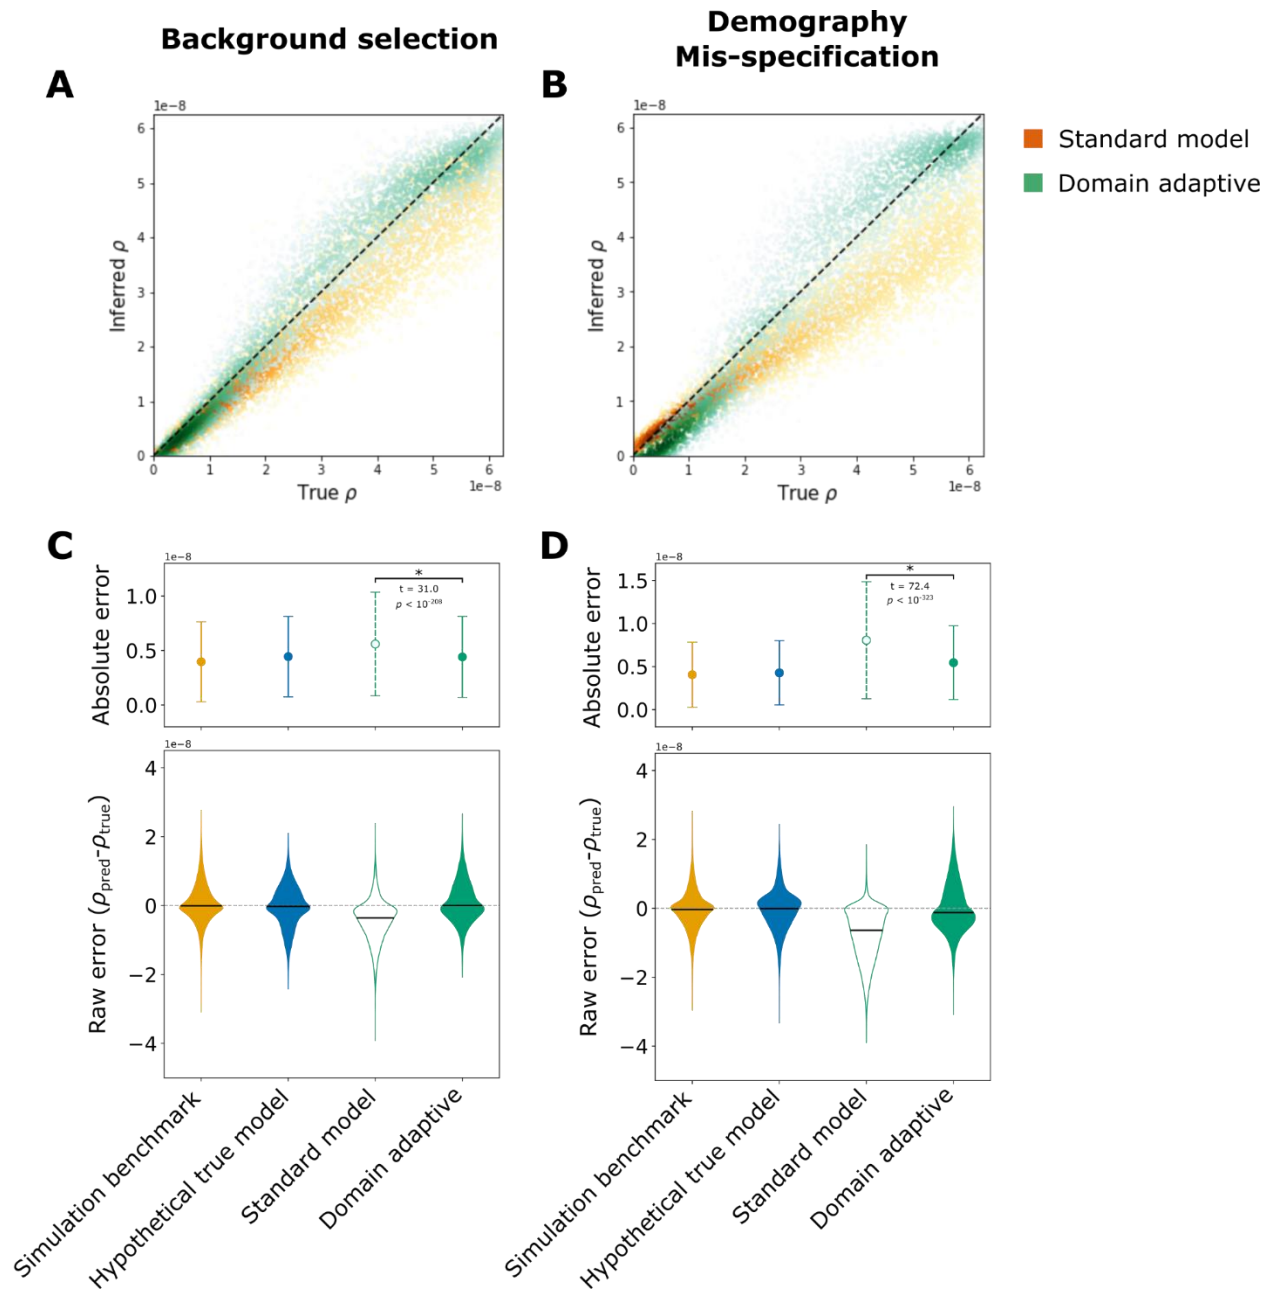

690 **Supplementary Figure 4. Recombination rate inference performance of ReLERNN**  
 691 **models.** Raw data used to plot **Figs. 4A** and **4B** are presented in **(A)** and **(B)**,  
 692 respectively. Performance of ReLERNN models in the simulation experiment of failure to  
 693 account for background selection **(C)** and in the simulation experiment of demographic  
 694 model mis-specification **(D)** is presented in terms of mean and standard deviation of the  
 695 absolute error (top) as well as the distribution of raw error (bottom). Statistical significance  
 696 (\*) of the difference between the absolute error of the standard model and that of the  
 697 domain-adaptive model is evaluated with Welch's *t*-test. See **Fig. 1C** for definition of the  
 698 model labels.
